# Supplementary material for: Acute inhibition of neurosteroid estrogen synthesis suppresses status epilepticus in an animal model
Source: eLife journal article supplement (doi:10.7554/elife.12917), 2016-04-12

Figure 1 - figure supplement 1

Representative 1st electrographic seizures before i.v. Veh/Fad injection

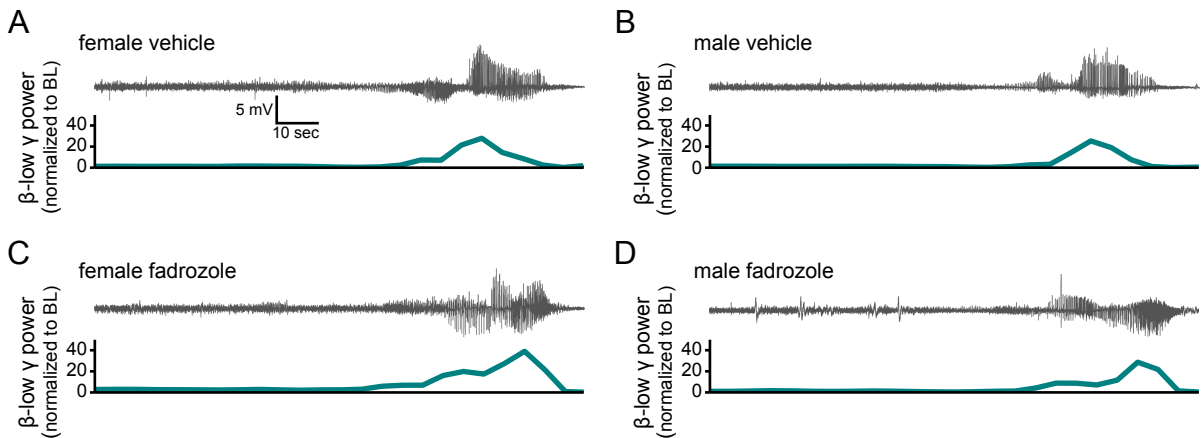

No difference in characteristics of 1st seizures in gonadectomized rats

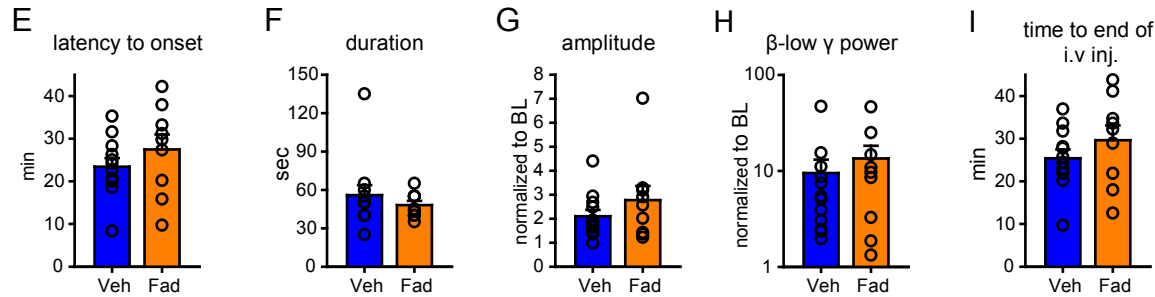

Supplement: supp [file elife_poa_e12917_Figure_1_figure_supplement_1.pdf › elife_poa_e12917_Figure_1_figure_supplement_1.pdf]
