# Supplementary material for: Acute inhibition of neurosteroid estrogen synthesis suppresses status epilepticus in an animal model
Source: eLife journal article supplement (doi:10.7554/elife.12917), 2016-04-12
Supplement: supp [file elife_poa_e12917_Figure_3_figure_supplement_1.pdf › elife_poa_e12917_Figure_3_figure_supplement_1.pdf]

Figure 3 - figure supplement 1

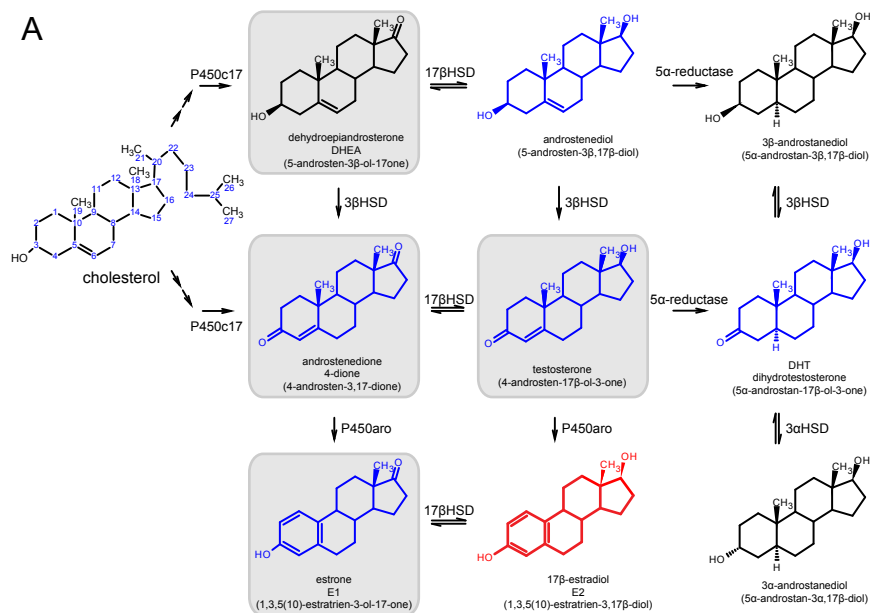

B

| compound                 |                                             | cross-reactivity |
|--------------------------|---------------------------------------------|------------------|
| corticosterone           | B; 4-pregnen-11 $\beta$ ,21-diol-3,20-dione | <0.01%           |
| 11-dehydrocorticosterone | 4-pregnen-21-ol-3,11,20-trione              | <0.01%           |
| allopregnanolone         | 5 $\alpha$ -pregnan-3 $\alpha$ -ol-20-one   | <0.01%           |
| pregnenolone             | 5-pregnen-3 $\beta$ -ol-20-one              | <0.01%           |
| dehydroepiandrosterone   | DHEA; 5-androsten-3 $\beta$ -ol-17-one      | 0.02%            |
| 17 $\alpha$ -estradiol   | 1,3,5(10)-estratrien-3,17 $\alpha$ -diol    | 0.02%            |
| testosterone             | T; 4-androsten-17 $\beta$ -ol-3-one         | 0.02%            |
| androstenedione          | 4-dione;4-androstene-3,17-dione             | 0.01%            |
| estrone                  | E1; 1,3,5(10)-estratrien-3-ol-17-one        | 10.16%           |
