# Supplementary material for: Acute inhibition of neurosteroid estrogen synthesis suppresses status epilepticus in an animal model
Source: eLife journal article supplement (doi:10.7554/elife.12917), 2016-04-12

Figure 7 - figure supplement 1

No difference in characteristics of 1st seizure in gonadally intact rats

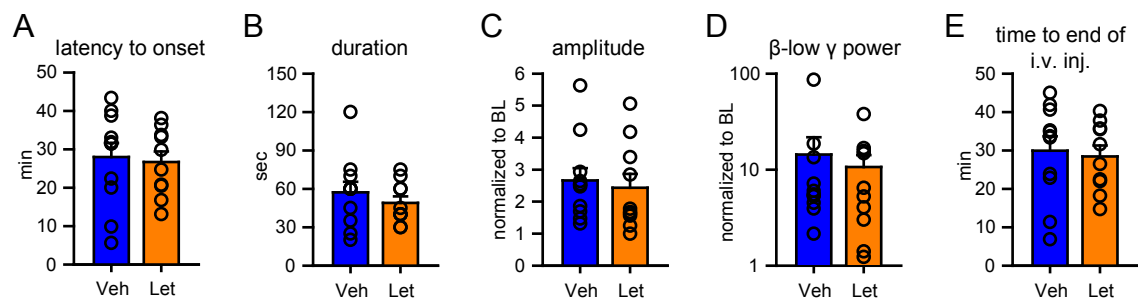

Supplement: supp [file elife_poa_e12917_Figure_7_figure_supplement_1.pdf › elife_poa_e12917_Figure_7_figure_supplement_1.pdf]
