# Supplementary figures and images for: Acute inhibition of neurosteroid estrogen synthesis suppresses status epilepticus in an animal model
Source: eLife journal article supplement (doi:10.7554/elife.12917), 2016-04-12

Figure 1 - figure supplement 2

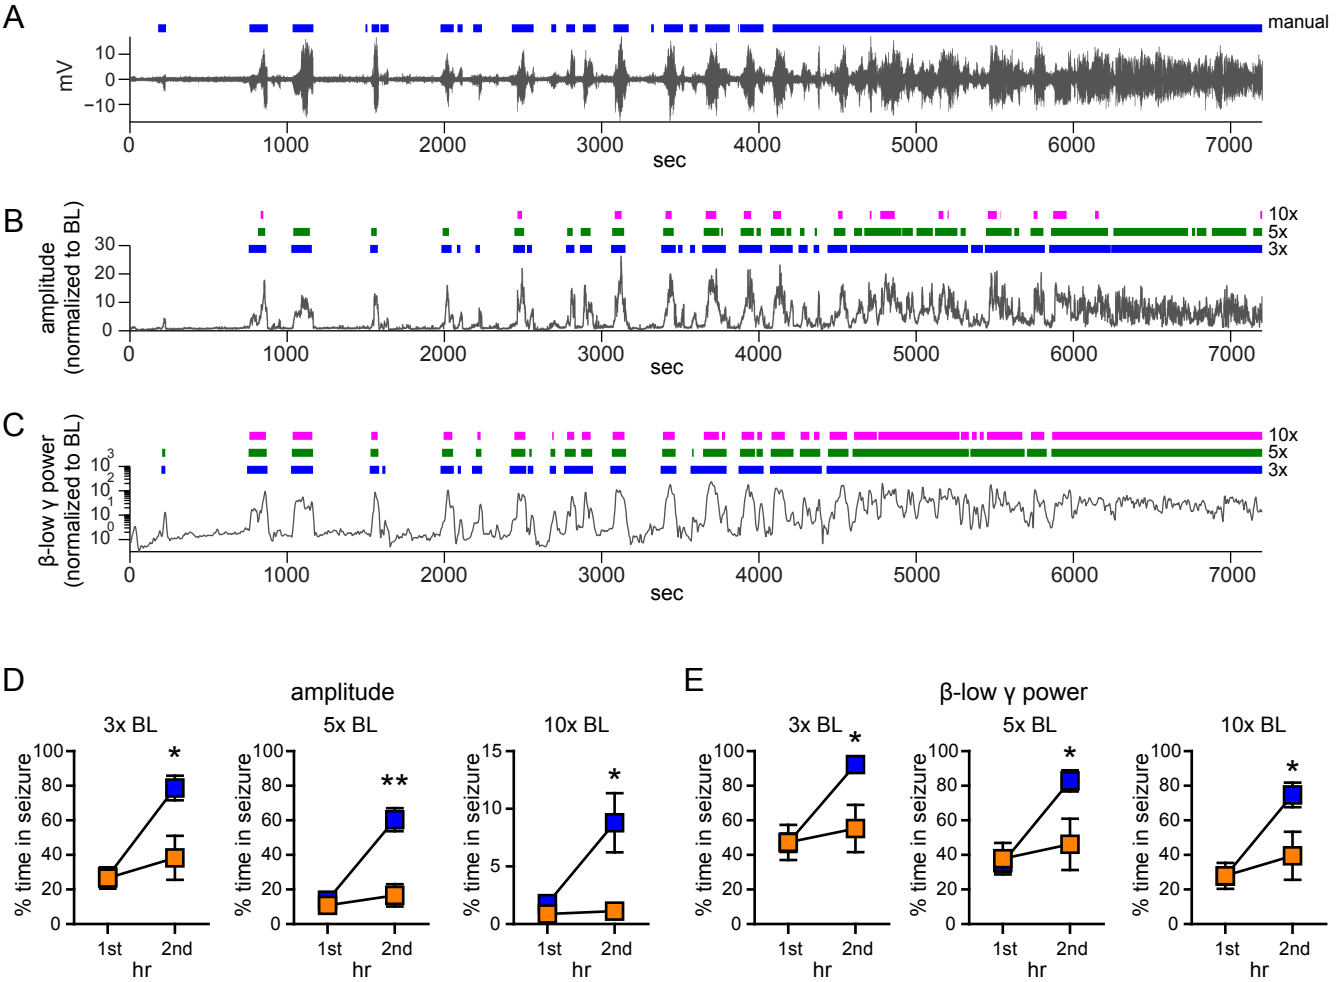

Supplement: supp [file elife_poa_e12917_Figure_1_figure_supplement_2.pdf › elife_poa_e12917_Figure_1_figure_supplement_2.pdf]

Figure 4 - figure supplement 1

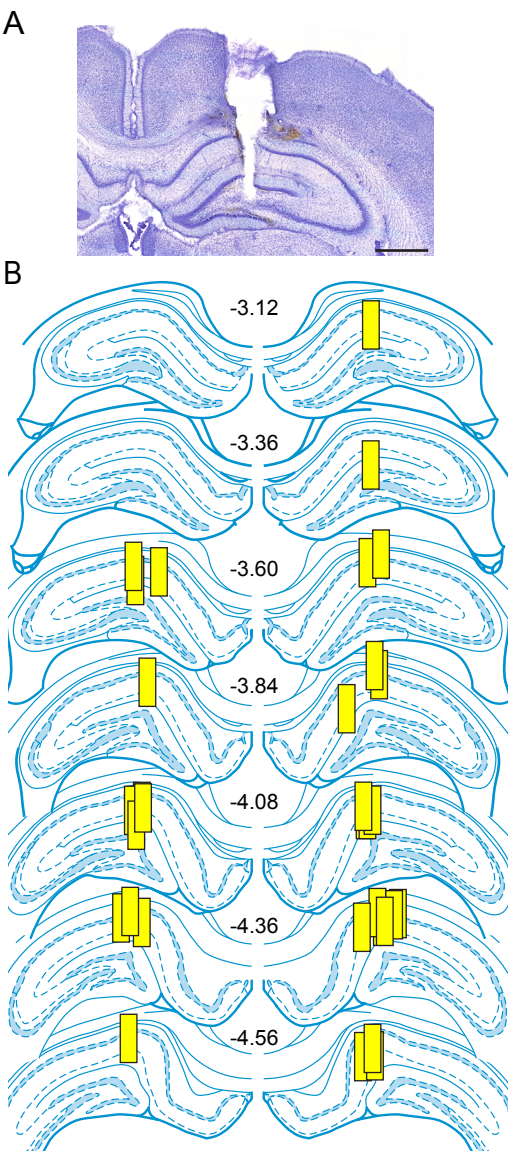

Supplement: supp [file elife_poa_e12917_Figure_4_figure_supplement_1.pdf › elife_poa_e12917_Figure_4_figure_supplement_1.pdf]

Figure 4 - figure supplement 2

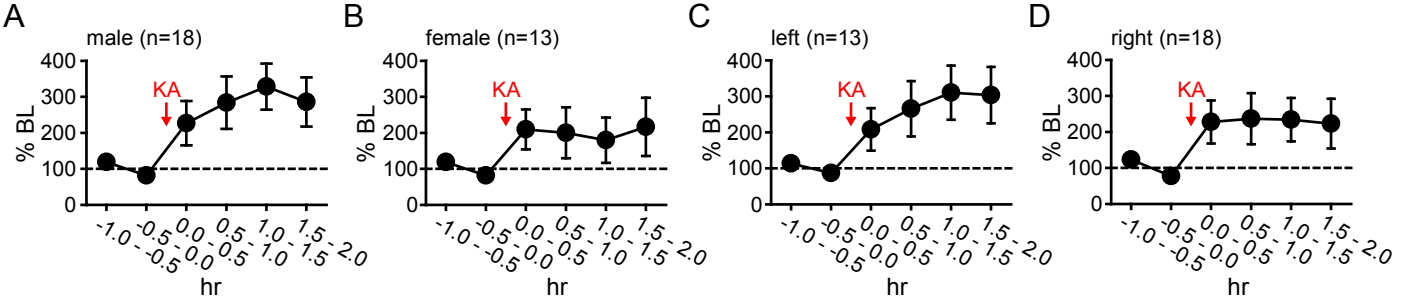

Supplement: supp [file elife_poa_e12917_Figure_4_figure_supplement_2.pdf › elife_poa_e12917_Figure_4_figure_supplement_2.pdf]

Figure 6 - figure supplement 1

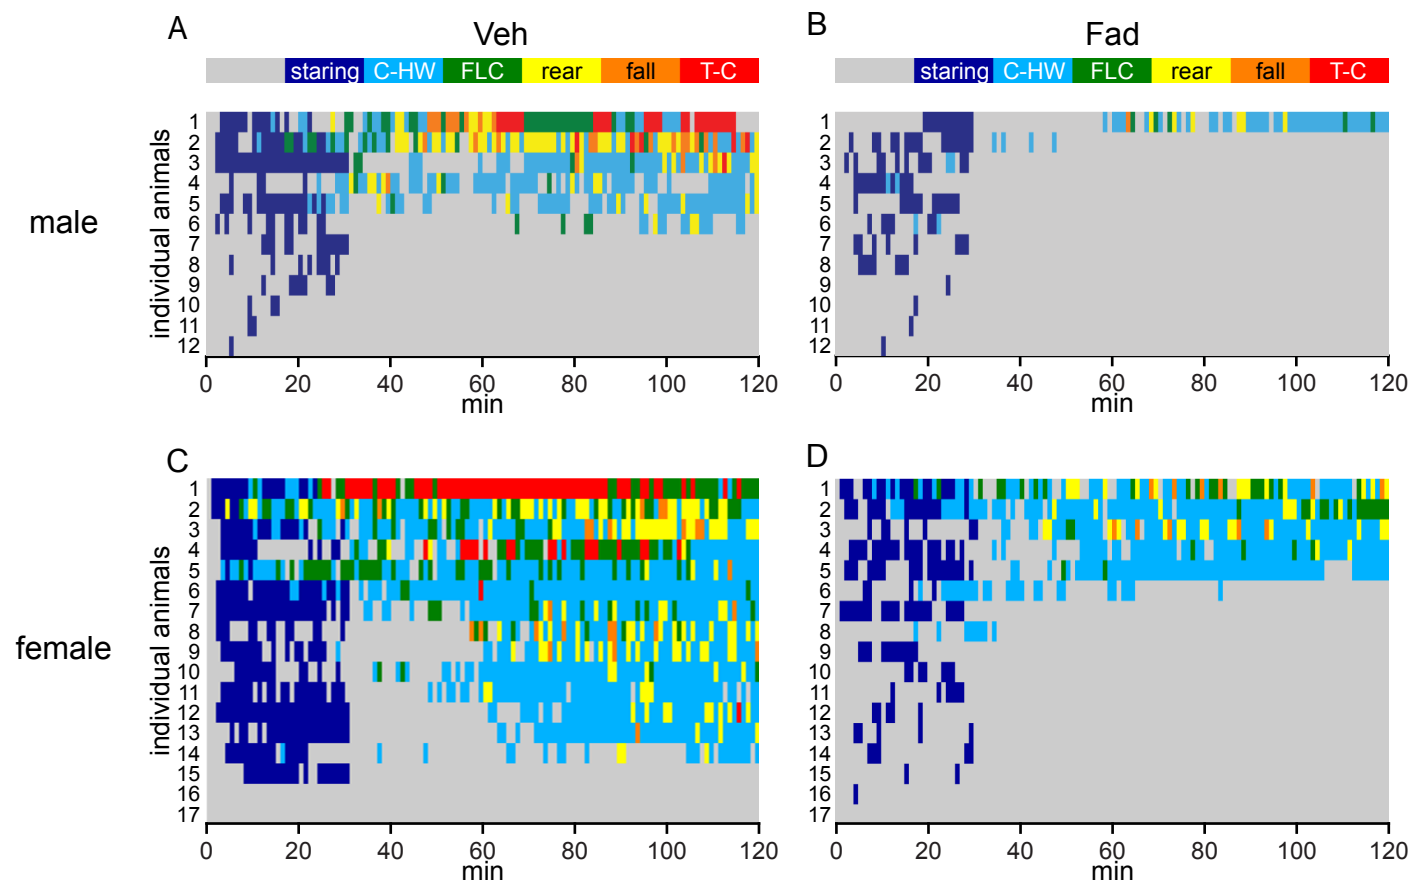

Supplement: supp [file elife_poa_e12917_Figure_6_figure_supplement_1.pdf › elife_poa_e12917_Figure_6_figure_supplement_1.pdf]

Figure 6 - figure supplement 2

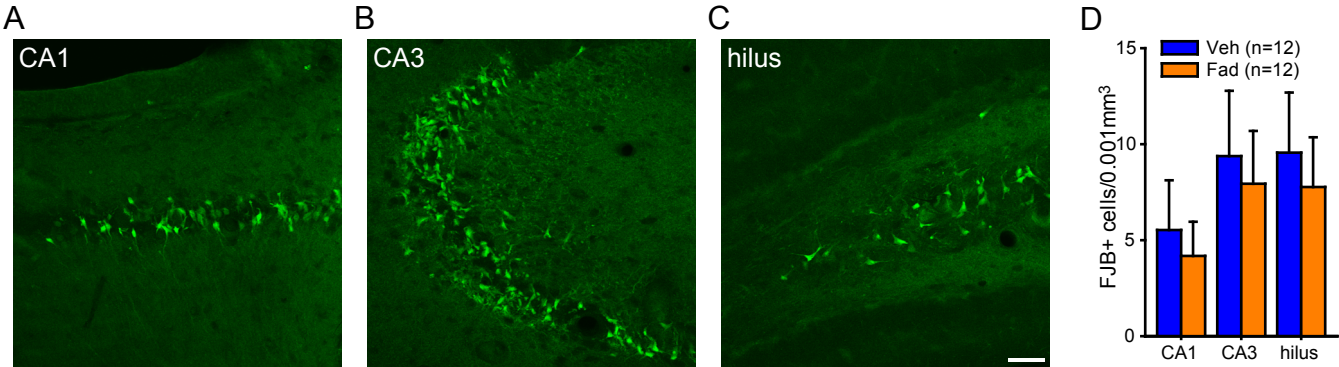

Supplement: supp [file elife_poa_e12917_Figure_6_figure_supplement_2.pdf › elife_poa_e12917_Figure_6_figure_supplement_2.pdf]

Figure 8 - figure supplement 1

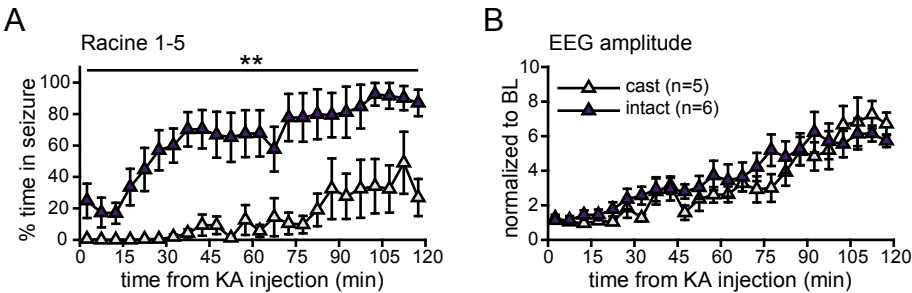

Supplement: supp [file elife_poa_e12917_Figure_8_figure_supplement_1.pdf › elife_poa_e12917_Figure_8_figure_supplement_1.pdf]

Figure 8 - figure supplement 2

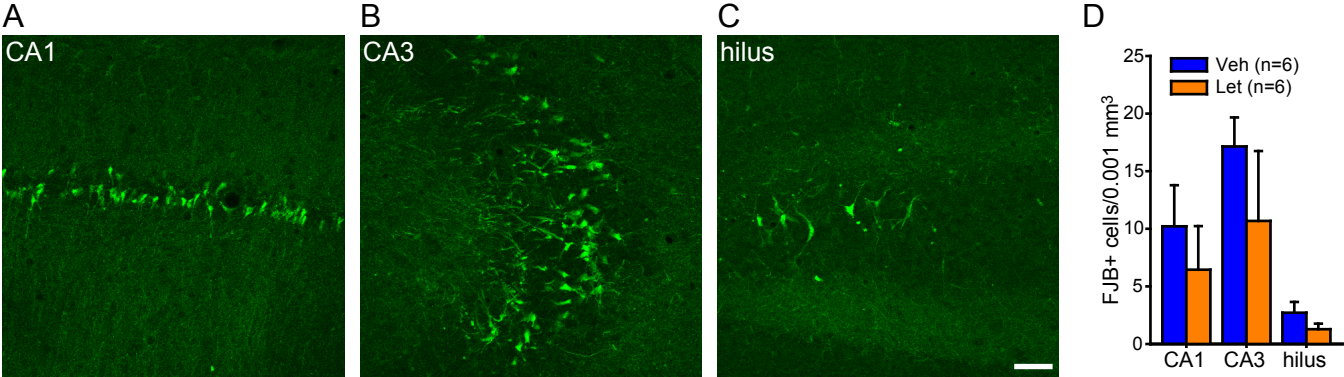

Supplement: supp [file elife_poa_e12917_Figure_8_figure_supplement_2.pdf › elife_poa_e12917_Figure_8_figure_supplement_2.pdf]
